# Supplementary material for: Extreme enhancement of secondary chirality through coordination-driven steric changes of terpyridyl ligand in glutamide-based molecular gels
Source: Royal Society of Chemistry journal article supplement (doi:10.1039/d0ra05057a), 2020-01-01
Supplement: d0ra05057a1.pdf [file d0ra05057a1.pdf]

*Supporting Information*

Extreme enhancement of secondary chirality through coordination-driven steric changes of terpyridyl ligand in glutamide-based molecular gels

Makoto Takafuji,<sup>\*a</sup> Tomoki Kawahara,<sup>a</sup> Nahid Sultana,<sup>a</sup> Naoya Ryu,<sup>b</sup> Kyohei Yoshida,<sup>c</sup>  
Yutaka Kuwahara,<sup>a</sup> Reiko Oda<sup>c</sup> and Hirotaka Ihara<sup>a</sup>

<sup>a</sup>Department of Applied Chemistry and Biochemistry, Kumamoto University,  
2-39-1 Kurokami, Chuo-ku, Kumamoto 860-8555 Japan.  
Email: takafuji@kumamoto-u.ac.jp, ihara@kumamoto-u.ac.jp

<sup>b</sup>Materials Development Department, Kumamoto Industrial Research Institute,  
3-11-38 Higashimachi, Higashi-ku Kumamoto 862-0901, Japan.

<sup>c</sup>Institut de Chimie & Biologie des Membranes & des Nano-objets (UMR5248 CBMN), CNRS,  
Université de Bordeaux, Institut Polytechnique Bordeaux,  
2 rue Robert Escarpit, 33607 Pessac, France.

## Figure S1

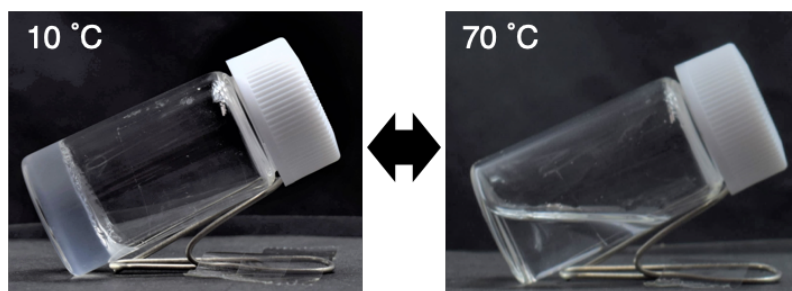

Figure S1 Photographic images of a 9:1 cyclohexane-methanol solution of **G-tpy** (5 mM) at 10 °C (gel phase) and 70 °C (sol phase).

## Table S1

Table S1 Gelation property of **G-tpy** in various organic solvent

| Solvent                        | <b>G-tpy</b> |       |
|--------------------------------|--------------|-------|
|                                | 70 °C        | 10 °C |
| Methanol                       | S            | I     |
| Ethanol                        | S            | I     |
| Ethyl acetate                  | I            | I     |
| Chloroform                     | S            | S     |
| Benzene                        | I            | I     |
| Cyclohexane                    | I            | I     |
| Chloroform-Cyclohexane (9 : 1) | S            | I     |
| Chloroform-Cyclohexane (5 : 5) | S            | G     |
| Chloroform-Cyclohexane (1 : 9) | I            | I     |
| Ethanol-Cyclohexane (9 : 1)    | S            | I     |
| Ethanol-Cyclohexane (5 : 5)    | S            | I     |
| Ethanol-Cyclohexane (1 : 9)    | S            | G     |

[**G-tpy**] = 5 mM

S: Soluble, I: Insoluble, G: Gelation

Figure S2

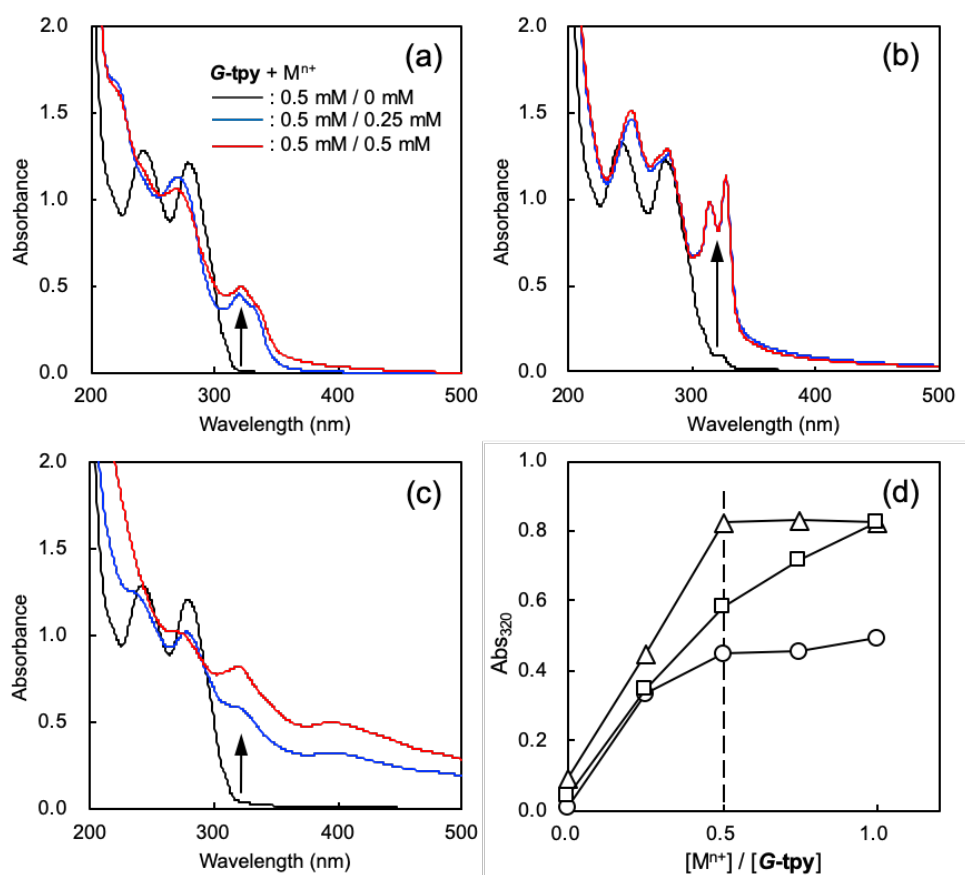

Figure S2. (a–c) UV-vis spectra of **G-tpy** without and with metal ions (a:  $Cu^{2+}$ , b:  $Zn^{2+}$ , c:  $Ru^{3+}$ ), and (d) relationships between absorbance at 320 nm and metal-ion concentration (circle:  $Cu^{2+}$ , triangle:  $Zn^{2+}$ , square:  $Ru^{3+}$ ).

Figure S3

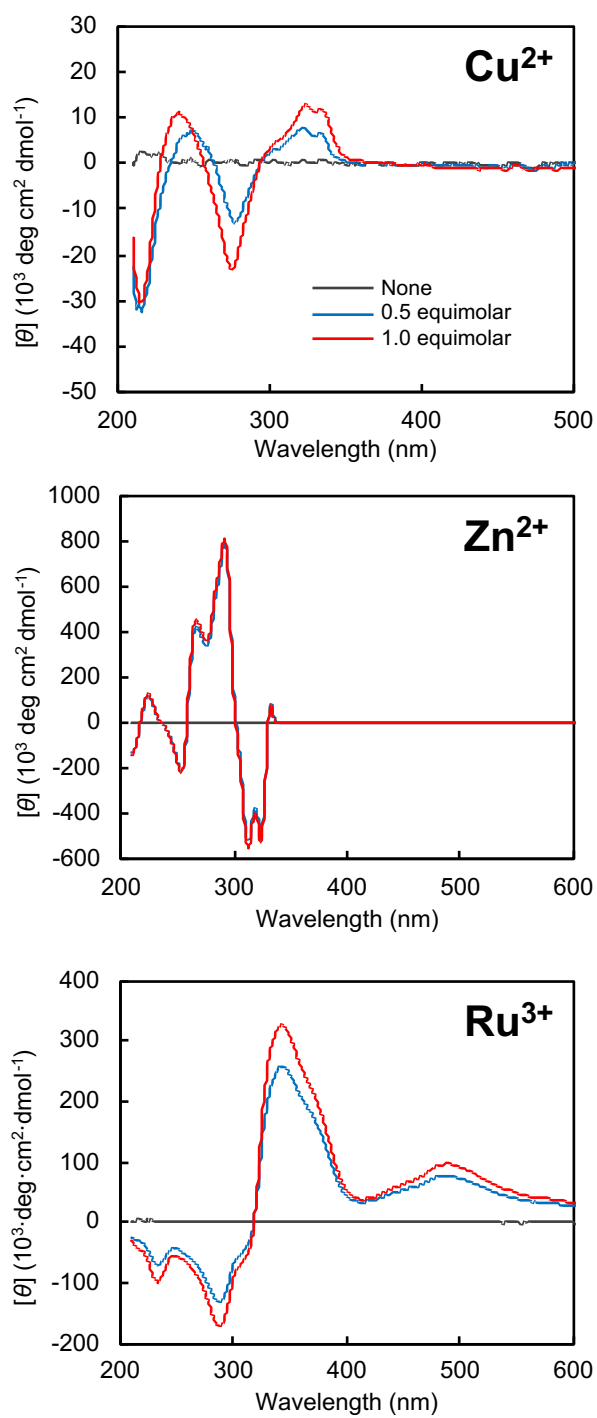

Figure S3 CD spectra of **G-tpy** without and with metal ions.  
[**G-tpy**] = 0.5 mM.

**Figure S4**

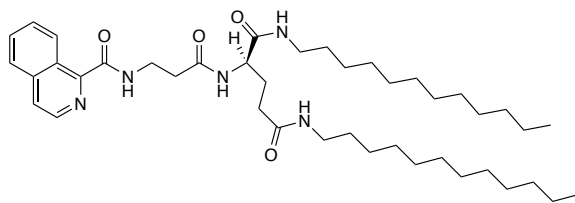

**G-iq**

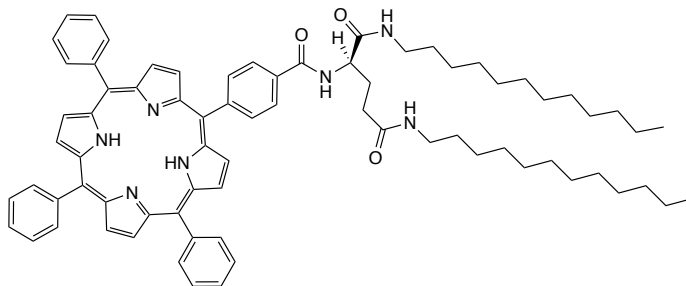

**G-por**

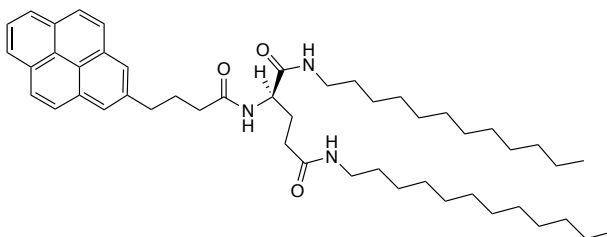

**G-pyr**

Figure S4 Chemical structures of **G-iq**, **G-por** and **G-pyr**.

Figure S5

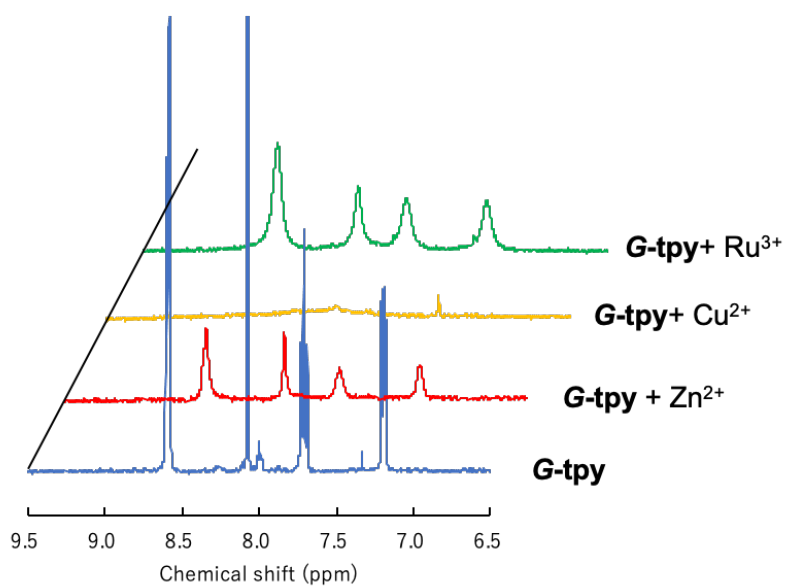

Fig. S5 <sup>1</sup>H NMR spectra of **G-tpy** without and with metal ions.  
Solvent: cyclohexane-*d*12 and ethanol-*d*6 (9 : 1). [**G-tpy**] = [metal ion] = 2.5 mM.

Figure S6

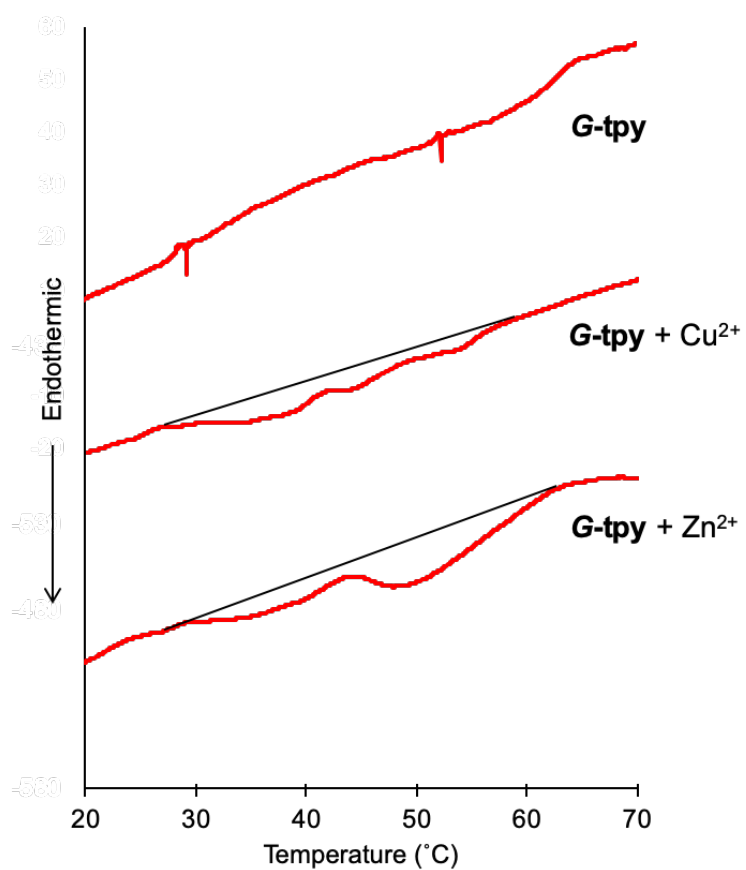

Figure S6 DSC thermograms of **G-tpy** without and with Cu<sup>2+</sup> and Zn<sup>2+</sup>.  
[**G-tpy**] = 10 mM, [metal ion] = 5 mM. Heating rate = 2 °C/min

Figure S7

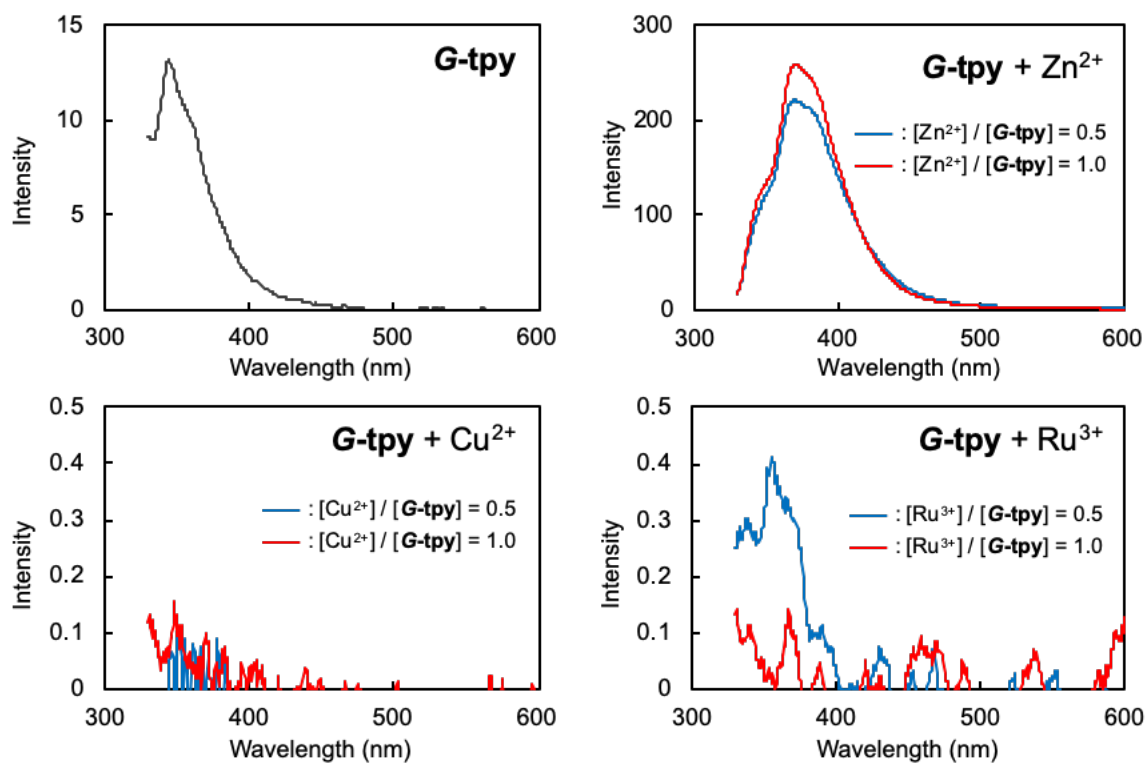

Figure S7 Fluorescence spectra of **G-tpy** without and with various metal ions. [G-tpy] = 0.5 mM, [metal ion] = 0.25 mM and 0.5 mM. Excitation wavelength: 320 nm.



Figure S8

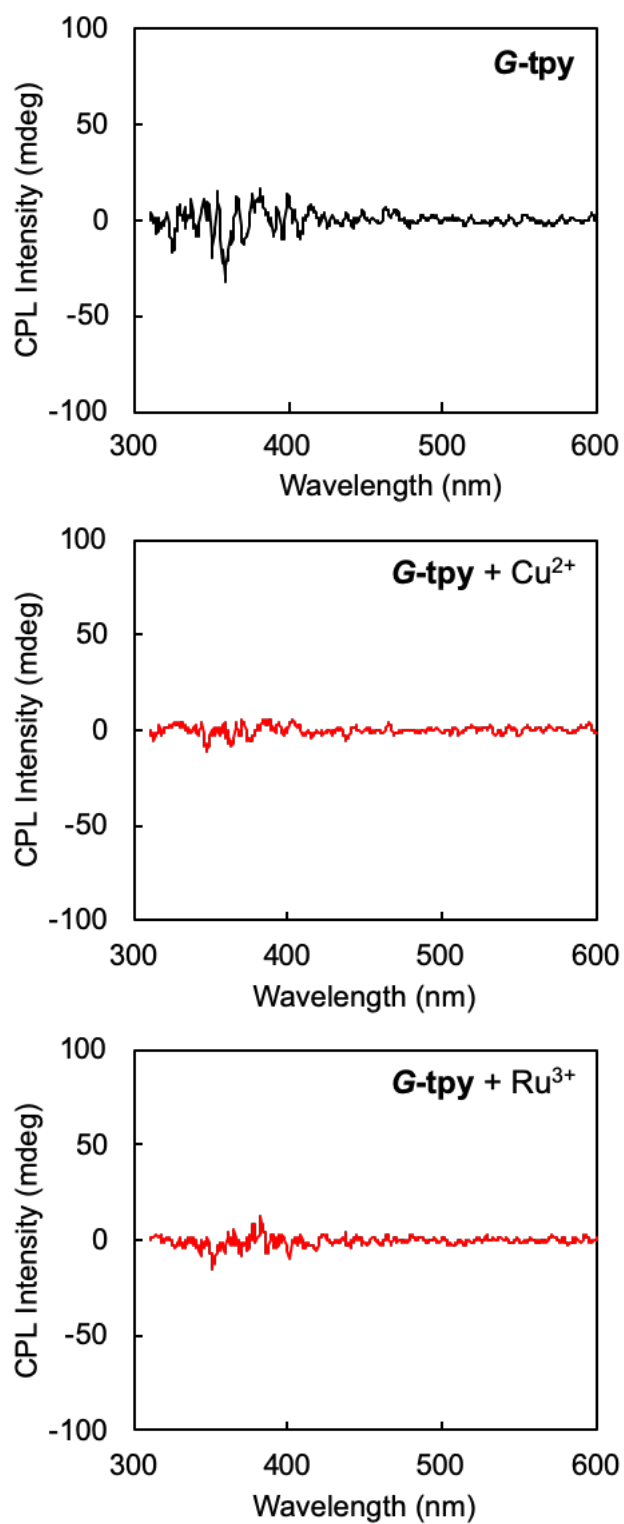

Figure S8 CPL spectra of **G-tpy** without and with Cu<sup>2+</sup> and Zn<sup>2+</sup>.  
[**G-tpy**] = 0.5 mM, [metal ion] = 0.5 mM. Excitation wavelength: 260 nm.

**Figure S9**

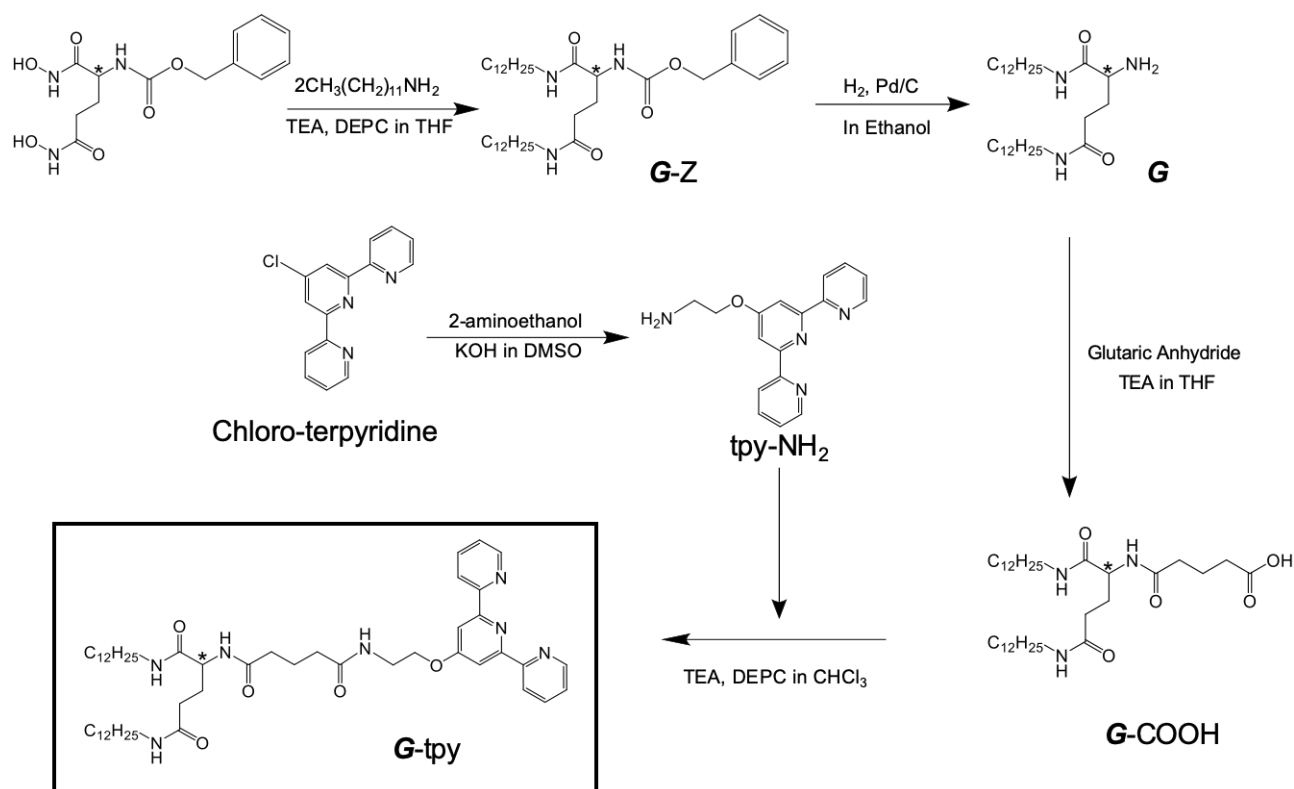

Figure S9 Synthetic procedure of **G-tpy**.

### 1. Synthesis of **G-Z** [1]

*N,N'*-Didodecyl-*N*-benzyloxycarbonylglutamide (**G-Z**). *N*-Benzyloxycarbonylglutamic acid (7.0 g, 25 mmol), *n*-dodecylamine (12 mL, 53 mmol), and triethylamine (8.9 g, 63 mmol) were dissolved in THF (400 mL) (23). The solution was cooled to 0 °C, and diethylphosphorocyanidate (DEPC) (10 mL, 64 mmol) was added to the solution and stirred for 1 h at this temperature. After stirring for 1 day at room temperature, the solution was concentrated in vacuo, and the residue was dissolved in 350 mL of chloroform. The solution was washed with 50 mL of 10%  $\text{NaHCO}_3$  (3 times), 50 mL of 0.3 N HCl (3 times) and with water until the pH becomes neutral. The solution was dried over  $\text{Na}_2\text{SO}_4$ , concentrated, and finally recrystallized from ethanol, which gave a white solid powder: yield 10.7 g (68%, 17 mmol); mp 141–143 °C; FT-IR (KBr)/ 3287, 2917, 2850, 1686, 1637, and 1539  $\text{cm}^{-1}$ ;  $^1\text{H}$  NMR ( $\text{CDCl}_3$ )  $\delta$  0.862-0.896 (t, 6H,  $\text{CH}_3$ ), 1.257 (m, 36H,  $\text{CH}_3$ -  $(\text{CH}_2)_9$ ), 1.486 (m, 4H,  $\text{CH}_2\text{CH}_2\text{NHC}(=\text{O})$ ), 1.980 (m, 1H,  $\text{C}^*\text{HCH}_2$ ), 2.091 (m, 1H,  $\text{C}^*\text{HCH}_2$ ), 2.297 (m, 2H,  $\text{C}^*\text{HCH}_2$ - $\text{CH}_2\text{C}(=\text{O})$ ), 3.221 (m, 4H,  $\text{CH}_2\text{NHC}(=\text{O})$ ), 4.144 (m, 1H,  $\text{C}^*\text{H}$ ), 5.098 (s, 2H,  $\text{CH}_2\text{Ph}$ ), 7.328 (s, 5H, Ph). Anal. Calcd. for  $\text{C}_{37}\text{H}_{65}\text{N}_3\text{O}_4$ : H, 10.9; C, 72.1; N, 6.82. Found: H, 10.9; C, 71.8; N, 6.75;

## 2. Synthesis of **G** [1]

*N*<sub>1</sub>,*N*<sub>2</sub>-didodecyl-L-glutamide (**G**) was synthesized according to our previous report.<sup>[1]</sup> mp 117.5–119.5 °C. IR spectrum (KBr): 3326, 2920, 2850, 1634, 1533 cm<sup>-1</sup>. <sup>1</sup>H NMR (400 MHz, CDCl<sub>3</sub>, TMS, 25 °C): δ 0.86–0.90 (t, *J* = 6.0 Hz, 6H, –CH<sub>3</sub>), 1.26 (m, 36H, –(CH<sub>2</sub>)<sub>9</sub>–), 1.49 (m, 4H, –NHCH<sub>2</sub>CH<sub>2</sub>–), 1.91–1.96 (q, 2H, –C\*HCH<sub>2</sub>–), 2.30–2.34 (m, 2H, –C\*HCH<sub>2</sub>CH<sub>2</sub>–), 3.20–3.26 (m, 4H, –NHCH<sub>2</sub>–), 3.40–3.43 (t, 1H, C\*H), 6.08–6.15 (bs, 1H, –NH–), 7.29–7.35 (bs, 1H, –NH–). Anal. Calcd for C<sub>29</sub>H<sub>59</sub>N<sub>3</sub>O<sub>2</sub>: C, 72.3; H, 12.3; N, 8.7. Found: C, 72.1; H, 13.3; N, 8.9.

## 3. Synthesis of **G-COOH** [2]

*N*<sup>1</sup>-4-carboxybutanoyl-*N*<sup>2</sup>,*N*<sup>3</sup>-didodecyl-L-glutamide (**G-COOH**): **G-COOH** were synthesized according to our previous report. mp 153.0–155.0 °C. IR spectrum (KBr): 3292, 2920, 2850, 1703, 1637, 1556 cm<sup>-1</sup>. <sup>1</sup>H NMR (400 MHz, CDCl<sub>3</sub>, TMS, 25 °C): δ 0.86–0.90 (t, *J* = 6.0 Hz, 6H, –CH<sub>3</sub>), 1.25–1.30 (m, 36H, –(CH<sub>2</sub>)<sub>9</sub>–), 1.45–1.52 (m, 4H, –NHCH<sub>2</sub>CH<sub>2</sub>–), 1.90–2.15 (m, 4H, –C\*HCH<sub>2</sub>CH<sub>2</sub>–), 2.30–2.39 (m, 6H, HO(C=O)CH<sub>2</sub>CH<sub>2</sub>CH<sub>2</sub>–), 3.15–3.25 (m, 4H, –NHCH<sub>2</sub>–), 4.40–4.50 (m, 1H, C\*H), 6.20–6.25 (t, 1H, –NH–), 7.05–7.10 (t, 1H, –NH–), 8.55–8.60 (d, 1H, –NH–). Anal. Calcd for C<sub>34</sub>H<sub>65</sub>N<sub>3</sub>O<sub>5</sub>: C, 68.5; H, 11.0; N, 7.1. Found: C, 67.9; H, 11.7; N, 7.1.

## 4. Synthesis of **tpy-NH<sub>2</sub>** [3]

4'-Chloro-2,2':6',2''-terpyridine (546 mg, 2 mmol) and ethanolamine (360 μl, 3 mmol) were added to a stirred suspension of powdered KOH (560 mg, 10 mmol) in DMSO (10 ml) and stirred at 40 °C for 1 day. The reaction mixture was then added to 80 mL of methylene chloride and wash with 50 mL of water (3 times). The methylene chloride solution was dried over Na<sub>2</sub>SO<sub>4</sub> and the solvent was removed. After it was recrystallized by toluene and hexane mixture to give a light yellow powder: yield 345 mg (59%). mp 130.0–132.0 °C. IR spectrum (KBr): 3362, 2920, 2850, 1559, 1412, 1204 cm<sup>-1</sup>. <sup>1</sup>H NMR (400 MHz, CDCl<sub>3</sub>, TMS, 25 °C): δ 3.15–3.17 (t, 2H, *H*<sub>α</sub>), 4.25–4.28 (t, 2H, *H*<sub>β</sub>), 7.32–7.35 (t, 2H, *H*<sub>5;5''</sub>), 7.83–7.88 (t, 2H, *H*<sub>4;4''</sub>), 8.03–8.05 (s, 2H, *H*<sub>3';5'</sub>), 8.61–8.63 (d, 2H, *H*<sub>3;3''</sub>), 8.68–8.70 (d, 2H, *H*<sub>6;6''</sub>).

## 5. Synthesis of **G-tpy**

**G-COOH** (0.40 g, 0.67 mmol), **tpy-NH<sub>2</sub>** (0.23 g 0.79 mmol), triethylamine (TEA, 2.53 g 3.48 mmol) and diethyl cyanophosphonate (DEPC, 0.45 ml 2.88 mmol) were dissolved in chloroform (200 mL) and the mixture was stirred for 1 hour in the ice water. Then the reaction mixture was stirred for 1 day in the room temperature. The reaction mixture was washed with 50 mL of 0.3 N HCl (3 times), 50 mL of 1 N NaOH (3 times) with water until the pH becomes neutral. The chloroform solution was

dried over  $\text{Na}_2\text{SO}_4$  and the solvent was removed. After it was recrystallized by methanol to give a white powder: yield 464 mg (80%). mp 192.0–196.0 °C. IR spectrum (KBr): 3292, 2920, 2850, 1637, 1556, 1204  $\text{cm}^{-1}$ .  $^1\text{H}$  NMR (400 MHz,  $\text{CDCl}_3$ , TMS, 25 °C):  $\delta$  0.86–0.90 (t,  $J = 6.0$  Hz, 6H,  $-\text{CH}_3$ ), 1.25–1.30 (m, 36H,  $-(\text{CH}_2)_9-$ ), 1.45–1.52 (m, 4H,  $-\text{NHCH}_2\text{CH}_2-$ ), 1.90–2.01 (m, 2H,  $-\text{C}^*\text{HCH}_2-$ ) 1.97–2.01 (t, 2H,  $-\text{C}^*\text{HNHC}(=\text{O})\text{CH}_2\text{CH}_2-$ ), 2.30–2.39 (m, 6H,  $-\text{CH}_2\text{CH}_2\text{CH}_2\text{C}(=\text{O})-$ ) 3.15–3.25 (dt, 4H,  $-\text{CH}_2-$ ) 3.66–3.86 (m, 2H,  $-\text{C}^*\text{H NHC}(=\text{O})\text{CH}_2\text{CH}_2\text{CH}_2\text{C}(=\text{O})\text{NHCH}_2-$ ) 4.32–4.50 (m, 3H,  $-\text{C}^*\text{HNHC}(=\text{O})\text{CH}_2\text{CH}_2\text{CH}_2\text{C}(=\text{O})\text{NH CH}_2\text{CH}_2-$ ) 6.10–6.15 (t, 1H,  $-\text{NH}-$ ) 6.63–6.72 (t, 1H,  $-\text{NH}-$ ) 6.89–6.97 (d, 2H,  $-\text{NH}-$ ) 7.32–7.35 (t, 2H,  $H_5, 5''$ ) 7.83–7.88 (t, 2H,  $H_4, 4''$ ) 8.03–8.05 (s, 2H,  $H_3, 3''$ ) 8.61–8.63 (d, 2H,  $H_3, 3''$ ) 8.68–8.70 (d, 2H,  $H_6, 6''$ ). Anal. Calcd for  $\text{C}_{34}\text{H}_{65}\text{N}_3\text{O}_5$ : C, 70.4; H, 9.2; N, 11.3. Found: C, 70.0; H, 9.7; N, 11.3.

- [1] H. Ihara, M. Takafuji, C. Hirayama, D. F. O'Brien, *Langmuir* 1992, **8**, 1548–1553; H. Hachisako, Y. Murata, H. Ihara, *J. Chem. Soc. Perkin Trans.*, 1999, **2**, 2569–2577.
- [2] M. Takafuji, H. Ihara, C. Hirayama, H. Hachisako, K. Yamada, *Liq. Cryst.*, 1995, **18**, 97–99.
- [3] G. Maayan, B. Yoo and K. Kirshenbaum, *Tetrahedron Lett.*, 2008, **49**, 335–338.
